# Supplementary material
Source: Springer Nature journal article supplement (https://www.springermedizin.de/resource/supplementary/12889_2013_6498_MOESM2_ESM.pdf/9497950)

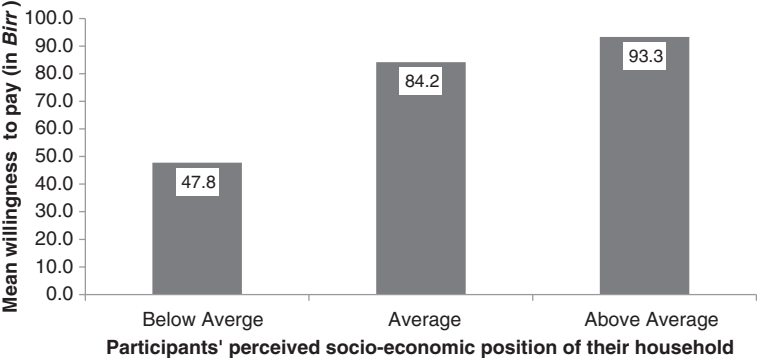

Supplement: MOESM2 [file 9497950]
